1     **The constant philopater hypothesis: a new life history invariant for dispersal evolution**

2

3                     António M. M. Rodrigues<sup>1,2,\*</sup>, Andy Gardner<sup>3,†</sup>

4

5     1. Department of Zoology, University of Cambridge, Downing Street, Cambridge CB2 3EJ,  
6     United Kingdom.

7

8     2. Wolfson College, Barton Road, Cambridge CB3 9BB, United Kingdom.

9

10    3. School of Biology, University of St Andrews, St Andrews KY16 9TH, United Kingdom.

11

12    \* corresponding author, telephone +44 (0)1223 (7)63897, fax +44 (0)1223 (3)36676,

13    email: [ammr3@cam.ac.uk](mailto:ammr3@cam.ac.uk)

14

15    † email: [andy.gardner@st-andrews.ac.uk](mailto:andy.gardner@st-andrews.ac.uk)

16

17    **Running title** – Dispersal and fecundity

18

19

20

21

22

23

24

25

26

27 **Abstract** – Life history invariants play a pivotal role in the study of social adaptation: they  
28 provide theoretical hypotheses that can be empirically tested, and benchmark frameworks  
29 against which new theoretical developments can be understood. Here we derive a novel  
30 invariant for dispersal evolution: the “constant philopater hypothesis” (CPH). Specifically, we  
31 find that, irrespective of variation in maternal fecundity, all mothers are favoured to produce  
32 exactly the same number of philopatric offspring, with high-fecundity mothers investing  
33 proportionally more, and low-fecundity mothers investing proportionally less, into dispersing  
34 offspring. This result holds for female and male dispersal, under haploid, diploid and  
35 haplodiploid modes of inheritance, irrespective of the sex ratio, local resource availability,  
36 and whether mother or offspring controls the latter’s dispersal propensity. We explore the  
37 implications of this result for evolutionary conflicts of interest – and the exchange and  
38 withholding of contextual information – both within and between families, and we show that  
39 the CPH is the fundamental invariant that underpins and explains a wider family of invariance  
40 relationships that emerge from the study of social evolution.

41

42 **Keywords** – class structure, demography, heterogeneity, migration, parent-offspring conflict,  
43 philopatry, reproductive value, seasonality, sex ratio, social evolution.

44

45

46

47

48

49

50

51

52

53 **Introduction**

54

55 A number of surprising invariance relationships have emerged from the study of social  
56 evolution, whereby a cancelling-out of multiple partial effects of a genetic, ecological or  
57 demographic parameter means that it has no net impact upon the evolution of a social  
58 behaviour. For example, in the study of sex allocation under “local mate competition”  
59 (Hamilton 1967), the number of sons produced by a mother is expected to be independent of  
60 her fecundity, in what is known as the “constant male hypothesis” (CMH; Frank, 1985,  
61 1987b; Yamaguchi, 1985). Specifically, the increased extent to which the sons of more-  
62 fecund mothers engage in costly competition with male relatives for mating opportunities  
63 means that a mother’s proportional investment into sons is expected to be inversely  
64 proportional to her fecundity, such that her absolute investment into sons is invariant with  
65 respect to her fecundity. Such invariance results provide an important stimulus for scientific  
66 advancement. For example, the discovery of the CMH invariant spurred both empirical  
67 testing and further development of theory in the field of sex allocation, which has continued  
68 in a sustained way from the mid 1980s to the present day (Frank, 1985, 1987a,b,c; May &  
69 Seger, 1985; Yamaguchi, 1985; Stubblefield & Seger, 1990; Foster & Benton, 1992;  
70 Hasegawa & Yamaguchi, 1995; Petersen & Fischer, 1996; Flanagan et al., 1998; Wool &  
71 Sulami, 2001; Ode & Rissing, 2002; Dagg & Vidal, 2004; Akimoto & Murakami, 2012;  
72 Akimoto et al., 2012; Rodrigues & Gardner, 2015).

73 Such invariance results may cross over from their field of origin to illuminate other  
74 topics, in which they give rise to new waves of theoretical and empirical research. For  
75 example, a surprising discovery that sex ratios are unaffected by the rate of female dispersal –  
76 owing to a cancellation of relatedness and kin-competition effects (Bulmer, 1986; Frank,  
77 1986; Taylor, 1988a) – was subsequently shown to translate to the evolution of helping and  
78 harming behaviours, stimulating a great deal of further theoretical and empirical study

79 (Taylor, 1992; Wilson et al., 1992; Taylor & Irwin, 2000; Irwin & Taylor, 2001; Perrin &  
80 Lehmann, 2001; Gardner & West, 2006; Lehmann et al., 2006; Alizon & Taylor, 2008; El  
81 Mouden & Gardner, 2008; Grafen & Archetti, 2008; Johnstone, 2008; Johnstone & Cant,  
82 2008; Kümmerli et al., 2009; Gardner, 2010; Rodrigues & Gardner, 2012, 2013a, 2013b; Yeh  
83 & Gardner, 2012). More generally, invariance with respect to transformation is the basis for  
84 all analogy and the generalisation of all scientific knowledge to new domains.

85         Dispersal is a major life history trait and received a considerable amount of attention  
86 from both theoreticians and empiricists and has been studied in relation to a variety of factors  
87 such as kin competition (Hamilton & May, 1977; Léna et al., 1998; Ronce et al., 1998, 2000;  
88 Leturque & Rousset, 2003; Kisdi, 2004; Innocent et al., 2010; Rodrigues & Johnstone, 2014),  
89 spatial and/or temporal heterogeneity (Comins et al., 1980; Hastings, 1983; Holt, 1985;  
90 Cohen & Levin, 1991; McPeck & Holt, 1992; Gandon & Michalakis, 1999; Leturque &  
91 Rousset, 2002; Massol et al., 2010; Rodrigues & Johnstone, 2014), parent-offspring offspring  
92 (Motro, 1983; Frank, 1986; Taylor, 1988b; Gandon, 1999; Starrfelt & Kokko, 2010),  
93 intragenomic conflict (Farrell et al., 2015), budding dispersal (Gandon & Michalakis, 1999),  
94 density-dependent dispersal (Crespi & Taylor, 1990; Travis et al., 1999; Poethke &  
95 Hovestadt, 2002; De Meester & Bonte, 2010; Baguette et al., 2011) and other types of  
96 condition-dependent dispersal (Ronce, 1998, 2000; Kisdi, 2004; Gyllenberg et al., 2011a,b).

97         One factor that is likely to have an important impact on the evolution of dispersal is  
98 variation in fecundity among group members, i.e. reproductive skew (Vehrencamp, 1983;  
99 Hager & Jones, 2009). The social evolutionary consequences of variation in fecundity has  
100 received attention in relation to helping and harming behaviour (Frank, 1996; Johnstone,  
101 2008; Bao & Wild, 2012; Rodrigues & Gardner, 2013a) and sex ratio (Yamaguchi, 1985;  
102 Frank, 1985, 1987c; Stubblefield & Seger, 1990; Rodrigues & Gardner, 2015). However, the  
103 implications for dispersal, and attendant conflicts of interest within and between families,  
104 remain to be addressed.

105 Here we study the evolution of dispersal in groups where the fecundity of breeders  
106 vary and report a new invariance result – the “constant philopater hypothesis” (CPH) – in the  
107 context of dispersal evolution. We find that, irrespective of variation in maternal fecundity,  
108 each mother is expected to make the same absolute investment into philopatric (i.e. non-  
109 dispersing) offspring. This is because higher fecundity is associated with one’s offspring  
110 facing more stringent kin competition for breeding opportunities when failing to disperse,  
111 such that each mother’s proportional investment into philopatric offspring is expected to be  
112 inversely proportional to her fecundity. We develop a mathematical kin-selection model to  
113 show that the CPH holds for female and male dispersal, under haploid, diploid and  
114 haplodiploid modes of inheritance, irrespective of the sex ratio, local resource availability,  
115 and whether mother or offspring controls the latter’s dispersal propensity. We provide explicit  
116 solutions for variation in resource availability within and between patches, considering both  
117 spatial heterogeneity and also temporal heterogeneity for unpredictable and seasonal  
118 environments, and we explore the implications of this result for evolutionary conflicts of  
119 interest – and the exchange and withholding of contextual information – both within and  
120 between families. Finally, we show that the CPH result is the fundamental invariant that  
121 underpins and explains a family of other invariance results, including the previously described  
122 “constant female hypothesis” (CFH; Frank, 1987c, 1998).

123

124

## Model and Results

125

### Model

127

We assume an infinite island model (Wright, 1931; Hamilton & May, 1977;

128

Rodrigues & Johnstone, 2014), with  $n$  mothers in every patch. There are different types of

129

patches, i.e. type- $t$  patches with  $t \in T = \{1, 2, \dots, n_p\}$ , and each type differing in its resource

130

availability. Within each patch, each mother is randomly assigned a rank  $i \in I = \{1, 2, \dots, n\}$ ,

131 and produces a large number of offspring in accordance with her rank, such that no two  
132 mothers in the same patch share the same rank, and all mothers sharing the same rank and  
133 patch type have the same fecundity. In the asexual version of the model we consider that all  
134 offspring are daughters and clones of their mother, and in the sexual version of the model we  
135 consider that a fraction  $\sigma_{it}$  of the offspring of a rank- $i$  mother are sons and a fraction  $1-\sigma_{it}$  are  
136 daughters and that there is a haploid, diploid or haplodiploid mode of inheritance. After  
137 reproduction, all mothers die, and the offspring of rank- $i$  mothers either remain in their natal  
138 patch with probability  $1-z_{it}$  or else they disperse with probability  $z_{it}$ , with a fraction  $1-c$  of  
139 dispersers relocating to a new randomly-chosen patch and the remainder  $c$  perishing en route.  
140 We assume that dispersal is controlled either by the offspring themselves or by their mother.  
141 In the sexual version of the model, individuals mate at random within their patches following  
142 dispersal, with each female mating once, after which all males die. Patches may maintain their  
143 resource availability, and therefore remain of the same type, or change their resource  
144 availability, and therefore change their type. Females then compete for breeding  
145 opportunities, with  $n$  females being chosen at random within each patch to become the  
146 mothers of the next generation, and all other females dying, which returns the population to  
147 the beginning of the lifecycle.

148

#### 149 Evolution of dispersal

150 Applying kin-selection methodology (Hamilton, 1964; Taylor & Frank, 1996; Frank,  
151 1997, 1998; Rousset, 2004; Taylor et al., 2007), we find that an increase in the probability of  
152 dispersal of an offspring of a rank- $i$  mother in a type- $t$  patch is favoured when

153

$$154 \quad -r_{it}\omega_t v_t + (1 - c)r_{it} \sum_{q \in T} p_q \omega_q v_q + \omega_t v_t h_t \sum_{j \in I} (U_{jt} \rho_{ijt}) > 0, \quad (1)$$

155

156 where:  $\omega_t$  is the probability that an individual wins a breeding site in a type- $t$  patch;  $v_t$  is the  
157 expected reproductive value of an individual in a type- $t$  patch;  $p_m$  is the frequency of type- $m$   
158 patches in the population;  $r_{it}$  is either the relatedness of a rank- $i$  mother in a type- $t$  patch to  
159 one of her offspring (when dispersal is under maternal control), or else the relatedness of the  
160 offspring to itself (when dispersal is under offspring control);  $h_t$  is the probability that a  
161 random individual sampled after dispersal was born in the local patch (i.e. the probability of  
162 philopatry);  $U_{jt}$  is the probability that this philopatric individual was produced by the rank- $j$   
163 mother; and  $\rho_{ijt}$  is the relatedness of the rank- $i$  mother (when dispersal is under maternal  
164 control) or an offspring of the rank- $i$  mother (when dispersal is under offspring control) to an  
165 offspring of the rank- $j$  mother in the same type- $t$  patch (see Supporting Information for more  
166 details).

167         If dispersal is under maternal control, then  $r_{it} = \rho_{iit}$ , as both of these quantities describe  
168 the relatedness of the rank- $i$  mother to her own offspring. However, if dispersal is under  
169 offspring control, then  $r_i$  is the relatedness of the focal offspring to itself, whilst  $\rho_{iit}$  is its  
170 relatedness to its siblings. Condition (1) holds for both the asexual and sexual models, and  
171 also for haploid, diploid and haplodiploid modes of inheritance. Under the sexual  
172 reproduction model, the quantities described in condition (1) are sex-specific: for instance, if  
173 we are considering the dispersal of females, then  $U_{jt}$  is the probability that a random  
174 philopatric female is a daughter of a rank- $j$  mother in a type- $t$  patch.

175

### 176 The constant philopater hypothesis

177         Of key interest is the quantity  $N_{it} = N_t U_{it}$ , which describes the number of philopatric  
178 offspring produced by a rank- $i$  mother in a type- $t$  patch, where  $N_t$  is the total number of  
179 philopatric offspring in the focal patch. Note that: the relatedness of a mother to her offspring,  
180 and the relatedness of the offspring to itself, are both independent of the mother's rank, so we  
181 may write  $r_{it} = r_t$  for all  $i \in I$ , and all  $t \in T$ ; the relatedness of an offspring to its siblings is

182 independent of its mother's rank, so we may write  $\rho_{iit} = \rho_t$  for all  $i \in I$ , and all  $t \in T$ ; and the  
 183 relatedness of a mother to another mother's offspring, and the relatedness of an offspring to  
 184 another mother's offspring, is independent of the rank of either mother, so we may write  
 185  $\rho_{ijt} = P_t$  for all  $t \in T$ , all  $i \in I$ , and all  $j \in I, j \neq i$ . Accordingly,  $\sum_{j \in I} U_{jt} \rho_{ijt} = U_{it} \rho_t +$   
 186  $P_t \sum_{j \in I, j \neq i} U_{jt} = U_{it} \rho_t + P_t(1 - U_{it})$ , and condition (1) can be rewritten as

187

$$188 \quad N_{it} > N_t \frac{1}{h_t \omega_t v_t} \frac{\omega_t v_t r_t - (1-c)r_t \sum_{m \in T} p_m \omega_m v_m - h_t \omega_t v_t P_t}{\rho_t - P_t} \quad (2)$$

189

190 That is, the number of philopatric offspring produced by each rank- $i$  mother in a type- $t$   
 191 patch is favoured to converge upon the RHS of condition (2) and, because this quantity is  
 192 independent of  $i$ , natural selection favours the number of philopatric offspring produced by  
 193 each and every mother to converge upon the same number (i.e.  $N_{it} = N_t^*$ , and  $U_{it} = U_t^*$ ),  
 194 irrespective of the total number of offspring that she produces and her sex allocation. This  
 195 result holds for both asexual and sexual reproduction under haploid, diploid, and haplodiploid  
 196 inheritance, for female and/or male dispersal and for maternal or offspring control of  
 197 dispersal. In analogy with the CMH, we term this invariant result the “constant philopater  
 198 hypothesis” (CPH).

199 The CPH emerges from a balance between the mortality risk of dispersing and the kin-  
 200 competition consequences of philopatry. From condition (1) we see that: because both the  
 201 relatedness of a mother to her own offspring and also the relatedness of an offspring to itself  
 202 are independent of maternal rank, the impact of the mortality cost of dispersal is the same for  
 203 all mothers within each patch ( $-r_{it}v_t + (1-c)r_{it} \sum_{m \in T} p_m v_m = -r_{it}v_t + (1-c)r_{it} \sum_{m \in T} p_m v_m$  for all  $i \in I$ ,  
 204 and  $t \in T$ ); because both the relatedness of a mother to another mother's offspring and also  
 205 the relatedness of an offspring to another mother's offspring are independent of maternal rank  
 206 ( $\rho_{ijt} = P_t$  for all  $t \in T$ , all  $i \in I$ , and all  $j \in I, j \neq i$ ), the offspring of all mothers experience the  
 207 same strength of kin competition if all mothers produce the same number of philopatric



208 offspring ( $h_t v_t U_t^* (r_t + (n-1)P_t)$  under maternal control, or  $h_t v_t U_t^* (r_t + (n-1)\rho_t)$  under offspring  
209 control); and, because any correlation that does arise between maternal rank and number of  
210 philopatric offspring leads to stronger kin competition among the offspring of mothers who  
211 produce more philopatric offspring, which favours such mothers to reduce their number of  
212 philopatric offspring, any correlation between rank and number of philopatric offspring will  
213 tend to disappear.

214 All mothers are favoured to produce the same number of philopatric offspring, but  
215 various constraints may interfere with their ability to do so. One possible constraint is that  
216 some low-ranking mothers are unable to produce the requisite number of philopatric offspring  
217 even if none of their offspring disperse, on account of their low fecundity. In this case, the  
218 CPH invariant breaks down, analogous to the breakdown of the CMH when some mothers are  
219 of such low fecundity that they cannot produce the requisite number of sons even if all of  
220 their offspring are male (Frank, 1985, 1987c).

221

## 222 Within-patch heterogeneity

223 Above we have shown that the CPH holds under a very general set of assumptions,  
224 and we have expressed this result in terms of emergent quantities such as the relatedness and  
225 the probability of philopatry. Here we express these emergent quantities as a function of the  
226 underlying ecological and demographic parameters, which enables us to explicitly determine  
227 the optimal dispersal behaviour of offspring in particular scenarios. Here we focus on a  
228 particular case to illustrate how different model parameters mediate the optimal dispersal rates  
229 of offspring. We then contrast the optimal dispersal behaviour of offspring under maternal  
230 control with the optimal dispersal behaviour under offspring control to understand the role of  
231 the CPH in mediating parent-offspring conflict over dispersal.

232 We focus on a particular case in which there are two asexually-reproducing mothers  
233 per patch: a rank-1 mother with relatively-high fecundity (denoted by  $F_1$ ), and a rank-2

234 mother with relatively-low fecundity (denoted by  $F_2$ ). We denote the reproductive inequality  
235 between females by  $s$ , where  $s = 1 - (F_2/F_1)$ . We find that the probability of dispersal of  
236 offspring of high-fecundity mothers rises, whilst the probability of dispersal of offspring of  
237 low-fecundity mothers falls, as the reproductive inequality between mothers rises (Fig. 1). On  
238 the one hand, offspring of high-fecundity mothers and offspring of low-fecundity mothers  
239 both suffer the same cost of dispersal ( $c$ ), and the relatedness between a focal offspring and  
240 herself is equal ( $r_1 = r_2 = 1$ ), so the first term in inequality (1) is the same for both offspring  
241 (i.e.  $-c r_1 = -c r_2$ ). But, on the other hand, all else being equal, the number of philopatric  
242 offspring of the high-fecundity mother is greater than that of the low-fecundity mother ( $U_1 >$   
243  $U_2$ ): accordingly, the expected relatedness between a focal offspring of the high-fecundity  
244 mother and a random offspring in the patch is greater than the expected relatedness between a  
245 focal offspring of the low-fecundity mother and a random offspring in the patch (i.e.  
246  $h(U_1\rho_{11} + U_2\rho_{12}) > h(U_1\rho_{21} + U_2\rho_{22})$ , where  $\rho_{11} = \rho_{22} = 1$ , and  $\rho_{12} = \rho_{21} = \rho$ ). Therefore, the  
247 selection pressure for dispersal of offspring of high-fecundity mothers is stronger than the  
248 selection pressure for dispersal of offspring of low-fecundity mothers.

249 We also find that the mean probability of dispersal falls as the cost of dispersal rises  
250 (Fig. 1). As the cost of dispersal rises, the first term in inequality (1) decreases and the second  
251 term in inequality (1) increases. As the effect on the first term is stronger than the effect on  
252 the second term, the overall effect of increasing the cost of dispersal is that dispersal becomes  
253 less evolutionarily advantageous.

254 The number of philopatric offspring of the high-fecundity mother rises as the  
255 reproductive inequality between the two mothers increases, and as the cost of dispersal  
256 increases. So long as this number is not too high, low-fecundity mothers are able to match it  
257 (i.e.  $1 - z_1^* = (1-s)(1-z_2^*)$ ). However, if the number of philopatric offspring of high-fecundity  
258 mothers is too high (due to high  $s$  and / or high  $c$ ), then low-fecundity mothers cannot produce

259 the requisite number of philopatric offspring even if none of their offspring dispersal, and in  
260 such scenarios the CPH breaks down (Fig. 1).

261

### 262 Between-patch heterogeneity

263 *Temporally-stable environments* – We now consider a heterogeneous population in which  
264 there are type-1 patches with high resource-availability and type-2 patches with low resource-  
265 availability. We define the reproductive inequality between patches as  $s_b = 1 - (F_{12}/F_{11})$ , and  
266 the reproductive inequality within patches as  $s_1 = 1 - (F_{21}/F_{11}) = s_2 = 1 - (F_{22}/F_{12}) = s$ . We first  
267 consider a spatially-heterogeneous environment in which patches retain their type over  
268 generations. We find that the average probability of dispersal is higher from low-quality type-  
269 2 patches than from high-quality type-1 patches (Fig. 2, panel (c)). As a result, high-quality  
270 patches have more non-dispersing offspring than low-quality patches. However, in both types  
271 of patches, higher-ranking mothers disperse more offspring than lower-ranking mothers, and,  
272 as long as inequality within patches is sufficiently small, both high- and low-rank mothers  
273 produce exactly the same number of philopatric offspring irrespective of the quality of their  
274 patch (Fig. 2, panel (f)).

275

276 *Temporally-unpredictable environments* – We next consider unpredictable environments in  
277 which a patch's type in the next generation is independent of its type in the current  
278 generation. Under such circumstances, the expected reproductive value is identical across  
279 patches. Thus,  $v_t = v$ , for all  $t \in T$ . Moreover, the relatedness coefficients are also identical  
280 across patches. Thus,  $r = r_t$ ,  $\rho_t = \rho$ , and  $P_t = P$ . Therefore, inequality (2) becomes

281

$$282 \quad 1 > n \frac{1}{h_t \omega_t} \frac{\omega_t r - (1-c)r \sum_{m \in T} p_m \omega_m - h_t \omega_t P}{\rho - P}. \quad (3)$$

283

284 This means that, at equilibrium,  $h_t^* = h^*$  and  $\omega_t^* = \omega^*$ , and therefore natural selection favours  
285 the number of philopatric offspring produced by each and every mother to converge upon the  
286 same number (i.e.  $N_{it} = N_t^* = N^*$ , and  $U_{it} = U_t^* = U^*$ ). Thus, in unpredictable environments, the  
287 CPH holds not only within each patch, but also between patches (Fig. 2, panel (e)).

288

289 *Seasonal environments* – Finally, we consider seasonal environments in which a patch always  
290 changes its type from one generation to the next. We find that the average probability of  
291 dispersal is higher from high-quality type-1 patches than from low-quality type-2 patches  
292 (Fig. 2, panel (a)). As a result, low-quality patches have more philopatric offspring than high-  
293 quality patches. However, in both types of patches, higher rank mothers disperse more  
294 offspring than lower rank mothers, and, as long as inequality within patches is sufficiently  
295 small, both high- and low-rank mothers produce exactly the same number of philopatric  
296 offspring irrespective of the quality of their patch (see Fig. 2, panel (d)).

297

### 298 Parent-offspring conflict

299 Although the CPH result obtains irrespective of whether dispersal is controlled by the  
300 offspring themselves or by their mother, we find that the level of dispersal that is favoured  
301 does depend upon whose control it is under. This recovers Motro's (1983) result that an  
302 evolutionary conflict of interest often exists between mother and offspring with regards to  
303 dispersal, with mothers generally preferring that their offspring disperse at a rate that is higher  
304 than the rate at which the offspring would prefer to disperse themselves. This is on account of  
305 the mother being equally related to those offspring that disperse and their siblings that benefit  
306 from the resulting relaxation of kin competition, and her offspring being more related to  
307 themselves than they are to each other (see also Frank, 1986; Taylor, 1988b; Gandon, 1999;  
308 Starrfelt & Kokko, 2010).

309 Our model has crucially incorporated heterogeneity in maternal condition, and this  
310 allows us to investigate how such heterogeneity mediates the parent-offspring conflict of  
311 interests with respect to dispersal. Here, we determine whether the potential for conflict is  
312 greater in families with more resources (i.e. families with high-fecundity rank-1 mothers) or  
313 fewer resources (i.e. families with low-fecundity rank-2 mothers). We consider two scenarios:  
314 one in which offspring have complete information about their mothers' rank (i.e. conditional  
315 dispersal); and one in which offspring have no information about their mothers' rank (i.e.  
316 unconditional dispersal). We first focus on cases in which offspring have complete  
317 information about their mothers' rank. Here, we find that mothers always prefer greater  
318 dispersal rates of offspring than the offspring, irrespective of the resources available for each  
319 family (Fig. 3). However, the difference between the optimal behaviour from the mother's  
320 perspective and the optimal behaviour from the offspring's perspective is not the same for the  
321 different types of families. In particular, we find that for lower inequality, conflict is more  
322 pronounced within resource-poor families than within resource-rich families (Fig. 3). As  
323 inequality between families rises the optimal dispersal rate of offspring in resource-rich  
324 families rises, whereas the optimal dispersal rate of offspring in resource-poor families falls,  
325 irrespective of who controls the dispersal rate of offspring. When the inequality between  
326 families is sufficiently large, resource-poor families hit a threshold beyond which all their  
327 offspring are philopatric, independently of who controls the dispersal rate of offspring. At this  
328 point the conflict within resource-poor families ceases, whilst it still exists within resource-  
329 rich families (Fig. 3). In summary, when inequality is low, resource-poor mothers suffer more  
330 parent-offspring conflict over offspring dispersal than resource-rich families, but they still  
331 produce a fair amount offspring. When inequality is high, there is less conflict within  
332 resource-poor families, but their fecundity is very low.

333 We next contrast cases in which offspring have complete information about their  
334 mothers' rank with cases in which offspring have no information about their mothers' rank.

335 This allows us to investigate the circumstances under which mothers are selectively favoured  
336 to inform their offspring as to their rank versus withholding this contextual information. We  
337 find that when offspring know that they have rank-1 mothers, parent-offspring conflict is less  
338 strong than when offspring do not know the rank of their mothers (Fig. 3, panel (a)). This  
339 suggests that rank-1 mothers should disclose full information about their status to their  
340 offspring in order to minimise parent-offspring conflict. In contrast, we find that when  
341 offspring know that they have rank-2 mothers, parent-offspring conflict is stronger than when  
342 offspring do not know the rank of their mothers, as long as inequality is sufficiently small  
343 (Fig. 3, panel (b)). This suggests that rank-2 mothers should withhold information about their  
344 status from their offspring in order to minimise parent-offspring conflict. These conflicting  
345 selective forces generate an informational battleground between rank-1 and rank-2 mothers, in  
346 which rank-1 mothers are favoured to disclose maternity information to offspring in the group  
347 whilst rank-2 mothers are favoured to withhold it.

348

#### 349 Allomaternal control of dispersal

350 Above, we have considered that control of offspring dispersal occurs either by the  
351 offspring themselves or by their mothers. Whilst this may often be the case, in other situations  
352 mothers may control the dispersal traits of offspring other than their own. This may be  
353 particularly important when differences in fecundity between mothers are also extended to  
354 other behavioural traits such as dominance over other group members. First we consider a  
355 case in which the high-fecundity breeder has full control over the dispersal of her own  
356 offspring, but varies in the degree of control, denoted by  $\alpha$ , over the offspring of the low-  
357 fecundity mother, with  $0 \leq \alpha \leq 1$ . We find that the CPH holds as long as the high-fecundity  
358 mother does not exert any control over the dispersal of the low-fecundity mother's offspring  
359 (i.e. when  $\alpha = 0$ ; Fig. 4). However, when the degree of control by the high-fecundity mother  
360 increases, the dispersal probability of their own offspring decreases, whilst the dispersal

361 probability of the low-fecundity mother's offspring increases (Fig. 4, panel(a)). Indeed, when  
362 the high-fecundity mother reaches a certain degree of control, all of the low-fecundity  
363 mother's offspring are forced to disperse (i.e.  $z_2 = 1$ ). We obtain similar results when we  
364 allow the low-fecundity mother control the dispersal of the high-fecundity mother's offspring,  
365 where we denote the degree of control of the low-fecundity mother by  $\beta$ . When the degree of  
366 control by the low-fecundity mother increases, the dispersal probability of their own offspring  
367 decreases, whilst the dispersal probability of the low-fecundity mother's offspring increases  
368 (Fig. 4, panel(b)). If the degree of control is sufficiently high, all offspring of high-fecundity  
369 rank-1 mothers are forced to disperse, whilst all offspring of low-fecundity rank-2 mothers  
370 remain in the local patch. When the low-fecundity mother has no control over the high-  
371 fecundity mother's offspring (i.e. when  $\beta = 0$ ), the CPH holds, but not otherwise (i.e. when  $\beta$   
372  $> 0$ ; Fig. 4).

373

#### 374 The CPH underpins a family of invariance results

375 To the extent that any trait may be coincident with an individual's dispersal status, the  
376 CPH underpins a whole family of invariance results. For example, if dispersing individuals  
377 engage in aggressive behaviour whilst non-dispersing individuals are more docile (e.g. El  
378 Mouden & Gardner, 2008), then the present CPH result could be reframed as a "constant non-  
379 aggressor hypothesis". The important caveat here is that such derivative invariants are only  
380 expected to hold insofar as the focal trait is tightly coupled to dispersal status, and the fact  
381 that incomplete coupling leads to a failure of these invariants whilst the CPH continues to  
382 hold confirms that the CPH is the more fundamental invariant.

383 One such derivative invariant that has been previously described is the "constant  
384 female hypothesis" (CFH; Frank, 1987c, 1998). This is concerned with "local resource  
385 competition" (Clark, 1978) scenarios in which females are philopatric and males are the  
386 dispersing sex, and the CFH predicts that more fecund mothers will invest relatively less into

387 daughters than will less fecund mothers, such that all mothers will produce the same number  
388 of daughters, irrespective of their fecundity. This is because the selection gradient acting on  
389 the sex allocation strategy shows properties that are identical to those of the selection gradient  
390 acting on dispersal. Namely, if we assume that the sex-ratio of a mother (i.e.  $\sigma_{it}$ ) is now an  
391 evolving trait, rather than a parameter, the selection gradient acting on the sex allocation  
392 strategy of a mother is given by

393

$$394 \quad -\omega_f r_{if} + \omega_m r_{im} + \omega_f \sum_{j \in I} (U_j \rho_{ij}) > 0. \quad (4)$$

395

396 As in the CPH, the relatedness coefficients are independent of the mother's rank. Thus,  $r_i = r$   
397 and  $\rho_{ii} = \rho$  for all  $i \in I$ ;  $\rho_{ij} = P$  for all  $i \in I$ , and all  $j \in I$ ,  $j \neq i$ . Thus, mothers adjust their sex  
398 ratio such that each and every mother converge upon the same number of daughters (i.e.  $N_i =$   
399  $N^*$ , and  $U_i = U^*$ ).

400 However, this invariant result only holds when all daughters are philopatric. If females  
401 exhibit at least some propensity to disperse, then the selection gradient acting on the sex ratio  
402 is given by

403

$$404 \quad -(\omega_f(1 - z_i) + \omega_f z_i(1 - c))r_f + \omega_m r_{im} + \omega_f(1 - z_i)h \sum_{j \in I} (U_j \rho_{ij}) > 0. \quad (5)$$

405

406 This means that the first term of the selection gradient now depends on the fecundity of the  
407 focal mother, and therefore the CFH no longer holds. The CPH, by contrast, does hold,  
408 irrespective of the sex ratio produced by each mother. That is, it is the CPH that underpins the  
409 CFH, and not the reverse.

410

411

412



## Discussion

413

414

415 We have described a new life-history invariant result for dispersal evolution.  
416 Specifically, we have found that natural selection favours all mothers to produce the same  
417 number of philopatric offspring, irrespective of variation between mothers in the total number  
418 of offspring that they produce. This is because kin competition, arising from a failure to  
419 disperse, is related to the number, rather than the proportion, of a mother's philopatric  
420 offspring. In analogy with the similar "constant male hypothesis" (CMH) of the sex allocation  
421 literature (Frank, 1987c, 1998), we term this result the "constant philopater hypothesis"  
422 (CPH).

423 Such invariance results provide testable predictions in their own right, and also  
424 promote the interplay of theory and empirical testing by reducing the extent to which  
425 extraneous genetic, ecological and demographic parameters are confounding in comparative  
426 analyses (e.g. West et al., 2001; Rodrigues & Gardner, 2015). Moreover, they also facilitate  
427 the development and conceptualisation of theory. For example, the invariant relationship  
428 between helping and harming, on the one hand, and degree of population viscosity, on the  
429 other hand (Taylor, 1992; El Mouden & Gardner, 2008), has been used to demonstrate that  
430 heterogeneity in resource availability per se – and not any conflating effect of viscosity itself  
431 – modulates the evolution of helping and harming in viscous populations (Rodrigues &  
432 Gardner, 2012, 2013a). The CPH invariance prediction is readily amenable to empirical  
433 testing, as it is robust to variation in difficult-to-measure quantities such as the mortality risk  
434 associated with dispersal. Social groups in different species often comprise multiple breeders  
435 that vary in their fecundity (reproductive skew), and in some cases there is variation in the  
436 proportion / number of dispersers produced by each breeder (e.g. Crespi & Taylor 1990;  
437 Innocent et al., 2010). Our theory predicts that dispersal rates (or the fraction of dispersal

438 morphs) should be higher for more productive breeders, and that at the same time the number  
439 of philopatric offspring should be equal for each breeder.

440         In terms of reaction-norms, the CPH means that mothers with fecundity below a  
441 certain threshold should produce no dispersing offspring, while mothers with fecundity above  
442 that threshold should exhibit a positive correlation between their fecundity and the dispersal  
443 rate of their offspring. Such reaction norms with a critical threshold have also been observed  
444 in the context of the evolution of dispersal conditional on the overall number of individuals in  
445 a patch (Crespi & Taylor, 1990; Ezoe & Iwasa, 1997; Kisdi, 2004; Rodrigues & Johnstone,  
446 2014). Under certain conditions, this means that differences in density between patches before  
447 dispersal are eroded after dispersal. Specifically, we have shown that the CPH holds both  
448 within and between patches when the environment is temporally unpredictable but not for  
449 other types of temporal variation. This implies that there are two forces mediating the  
450 evolution of dispersal: one acting between patches that tends to equalise or enhance  
451 differences in density between them; and one acting within patches that tends to equalise  
452 differences in number of philopatric offspring among group members. These two forces may  
453 be operating simultaneously in natural population, and future empirical studies should take  
454 both into consideration.

455         We have shown that the adaptive adjustment of offspring dispersal conditional on  
456 maternal fecundity may have a dramatic impact on the amount of kin competition that each  
457 offspring experiences. More specifically, this means that variation in fecundity among  
458 breeders is not translated into an equivalent variation in kin competition among offspring.  
459 Indeed, owing to the CPH, the amount of kin competition may be precisely the same,  
460 irrespective of a mother's fecundity. This has wide-reaching implications for the evolution of  
461 social behaviour within groups. We have shown how the CPH underlies the "constant female  
462 hypothesis", an invariant result that has been previously described in the sex allocation  
463 literature (Frank, 1987c, 1998). Another topic for which the CPH may have important

464 implications is reproductive skew, which has been shown to promote the evolution of  
465 harming by high-fecundity mothers and helping by low-fecundity mothers (Johnstone, 2008).  
466 Crucially, that result has been derived under the assumption that, while helping and harming  
467 are conditional on a mother's fecundity, dispersal of offspring is not. An immediate  
468 consequence of the CPH is that, if offspring disperse conditionally, according to maternal  
469 fecundity, the asymmetry in the level of kin competition between high- and low-fecundity  
470 mothers vanishes, such that helping and harming are no longer favoured. This suggests a  
471 promising avenue for future theoretical and empirical study.

472         We have also shown that there will typically be a conflict of interests between parent  
473 and offspring with respect to the latter's probability of dispersing, and that the intensity of  
474 such conflict is modulated by heterogeneity in parental condition, and hence is liable to vary  
475 between families. We find that if inequality in fecundity is sufficiently low, the intensity of  
476 parent-offspring conflict is greater in resource-poor families but, by contrast, if the inequality  
477 is sufficiently high, the conflict within resource-poor families may vanish, with parents and  
478 offspring agreed that there should be no dispersal. To the extent that within-family conflict  
479 has a negative impact on a mother's fecundity, this result suggests that parent-offspring  
480 conflict may either reinforce inequality between families (when inequality is relatively low)  
481 or may attenuate inequality between families (when inequality is relatively high).

482         On account of our finding that parent and offspring dispersal optima depend upon the  
483 degree of heterogeneity in fecundity across families, we have uncovered a new informational  
484 battleground over dispersal, with high-fecundity mothers being favoured to disclose full  
485 information about their status to all the offspring in the group, and low-fecundity mothers  
486 being favoured to withhold this information. The resolution of this informational conflict will  
487 depend upon the specific biology of particular species (for reviews see Godfray, 1995; Kilner  
488 & Hinde, 2008). There are many examples of mothers disclosing contextual information to  
489 their offspring: in daphnia, for instance, mothers provide accurate information about the

490 presence of predators in the local environment, and offspring respond to this information by  
491 developing a protective helmet (Tollrian & Dodson, 1999). Conversely, there are examples of  
492 mothers withholding information or actively deceiving their offspring with regards to the  
493 circumstances in which they find themselves: in black-headed gulls, *Larus ridibundus*, for  
494 instance, mothers appear to adjust yolk androgen concentration in eggs in order to manipulate  
495 the offspring's perception of their birth order in the brood (Eising et al., 2001).

496 More generally, we suggest that the resolution of this informational conflict will  
497 depend on whether mothers are: (i) constrained to either honestly communicate their rank to  
498 their offspring or else withhold this information; or (ii) able to honestly communicate,  
499 withhold the information or deceive their offspring with regards to their rank. If deception is  
500 not an option, then in this simple binary scenario an offspring will always be able to correctly  
501 determine her mother's rank, either because her mother honestly communicates the fact that  
502 she is of rank-1 or else because her mother communicates no information, which enables the  
503 offspring to infer that she is of rank-2, and this system of signalling will be stably maintained  
504 by the coincidence of interests of the rank-1 mother and her offspring. However, if  
505 unconstrained deception is an option, then all mothers are expected to communicate that they  
506 are of rank-1, which provides no useful information to their offspring, and hence this system  
507 of communication is expected to collapse. The resolution of this conflict represents a further  
508 avenue for future research.

509 Our model provides an explanation for different patterns of dispersal within social  
510 groups depending on the degree of control by each group member, which can change the sign  
511 of rank-dependent dispersal. If each mother controls the dispersal of their own offspring or if  
512 offspring control their own dispersal, then we should expect a positive correlation between  
513 mother's fecundity and offspring propensity to disperse – i.e. positive rank-dependent  
514 dispersal. Under allomaternal control of offspring dispersal the mother with a higher degree  
515 of control is expected to force offspring of other mothers to disperse and therefore their own

516 offspring are less likely to disperse. If, for instance, the dominant mother controls the  
517 dispersal of offspring in the social group, then we should expected negative rank-dependent  
518 dispersal. For example, in meerkats the dominant is more likely to force distantly related  
519 offspring to disperse than their close relatives, and therefore offspring of lower rank mothers  
520 are more likely to disperse than offspring of higher rank mothers (i.e. negative rank-  
521 dependent dispersal rates; Clutton-Brock et al., 2010). By contrast, in the red-fronted lemurs,  
522 there is no correlation between dispersal and kinship, and therefore we should not expect  
523 negative rank-dependent dispersal rates (Kappeler & Fichtel, 2012, reviewed in Clutton-  
524 Brock, 2013). More generally, while in our model we have considered a simple control  
525 parameter, more species-specific resolution models can be adopted (e.g. Godfray, 1995;  
526 Kilner & Hinde, 2008). These possibilities also represent avenues for future theoretical and  
527 empirical exploration.

528         The CPH result emerges from key symmetries in relatedness, for instance the  
529 independence of the relatedness between two mothers breeding in the same patch with respect  
530 to their rank and hence their share of the group's total fecundity. This situation obtains in the  
531 present model owing to our assumption that rank is not inherited. However, more generally,  
532 rank may be heritable, to some extent, such that high-ranking females tend to be the daughters  
533 of highly-fecund mothers, in which case they may be more likely to breed alongside sisters  
534 than are females of lower rank, which could lead to a positive correlation between rank /  
535 fecundity and relatedness to group mates. Alternatively, whilst we have considered the cost of  
536 dispersal to be paid in terms of mortality, dispersal may also incur fecundity costs, which  
537 again could lead to a positive correlation between fecundity and relatedness, owing to low-  
538 fecundity dispersers being unrelated to their group mates.

539         Finally, although our results hold under a wide range of model assumptions, we have  
540 not studied the effects of many other potentially-relevant factors. It is likely that, in some of  
541 these cases, our model will fail to conform to empirical data. However, by highlighting those

542 scenarios in which our model's key assumptions are not met, our result may be used to  
543 illuminate otherwise obscured biological details, concerning a species' ecology, demography,  
544 phenotypic plasticity or cognition. In this respect, the model also establishes a baseline  
545 scenario, which may help to understand and interpret new empirical data and future  
546 mathematical results.

547

## 548 **Acknowledgements**

549

550 We thank: Rebecca Kilner for encouragement and support; and the Behavioural Ecology  
551 Group, Cambridge, for helpful discussion. This research was supported by Wolfson College  
552 Cambridge (A.M.M.R.) and the Natural Environment Research Council (grant no.  
553 NE/K009524/1) (A.G.).

554

## 555 **References**

556

557 Akimoto, S.-I. & Murakami, T. 2012. Condition-dependent sex allocation by clones of a  
558 galling aphid. *Behav. Ecol. Sociobiol.* **66**: 1475–1484.

559

560 Akimoto, S.-I., Mitsuhashi, R. & Yoshino, T. 2012. Female-biased sex allocation in wild  
561 populations of the eriosomatine aphid *Prociphilus oriens*: local mate competition or  
562 transgenerational effects of maternal investment? *Popul. Ecol.* **54**: 411–419.

563

564 Alizon, S. & Taylor, P.D. 2008. Empty sites can promote altruistic behavior. *Evolution* **62**:  
565 1335–1344.

566

- 567 Bao, M. & Wild, G. 2012. Reproductive skew can provide a net advantage in both conditional  
568 and unconditional social interactions. *Theor. Popul. Biol.* **82**: 200–208.
- 569
- 570 Baguette M., Clobert J. & Schtickzelle N. 2011 Metapopulation dynamics of the bog fritillary  
571 butterfly: experimental changes in habitat quality induced negative density-dependent  
572 dispersal. *Ecography* **34**: 170–176.
- 573
- 574 Bulmer, M.G. 1986. Sex ratio theory in geographically structured populations. *Heredity* **56**:  
575 69–73.
- 576
- 577 Clark, A.B. 1978. Sex ratio and local resource competition in a prosimian primate. *Science*  
578 **201**: 163–165.
- 579
- 580 Clutton-Brock, T. & Huchard, E. 2013. Social competition and its consequences in female  
581 mammals. *J. Zool.*, **289**: 151–171.
- 582
- 583 Clutton-Brock, T.H., Hodge, S.J., Flower, T.P., Spong, G.F. & Young, A.J. 2010. Adaptive  
584 suppression of subordinate reproduction in cooperative mammals. *Am. Nat.*, **176**: 664–673.
- 585
- 586 Cohen, D. & Levin, S.A. 1991. Dispersal in patchy environments: the effects of temporal and  
587 spatial structure. *Theor. Popul. Biol.* **39**: 63–99.
- 588
- 589 Comins, H.N., Hamilton, W.D. & May, R.M. 1980. Evolutionarily stable dispersal strategies.  
590 *J. Theor. Biol.* **82**: 205–230.
- 591

- 592 Crespi, B.J. & Taylor, P.D. 1990. Dispersal rates under variable patch density. *Am. Nat.* **135**:  
593 48–62.  
594
- 595 Dagg, J.L. & Vidal, S. 2004. Sex ratio adjustment and maternal condition in two aphid  
596 species. *Behav. Ecol. Sociobiol.* **55**: 231–235.  
597
- 598 De Meester N. Bonte D. 2010 Information use and density-dependent emigration in an  
599 agrobiont spider. *Behav. Ecol.* **21**: 992 – 998.  
600
- 601 Eising, C.M., Eikenaar, C., Schwabl, H. & Groothuis, T.G. 2001. Maternal androgens in  
602 black-headed gull (*Larus ridibundus*) eggs: consequences for chick development. *Proc. R.*  
603 *Soc. B* **268**: 839–846.  
604
- 605 El Mouden, C. & Gardner, A. 2008. Nice natives and mean migrants: the evolution of  
606 dispersal-dependent social behaviour in viscous populations. *J. Evol. Biol.* **21**: 1480–1491.  
607
- 608 Ezoe, H. & Iwasa, Y. 1997. Evolution of condition-dependent dispersal: A genetic-algorithm  
609 search for the ESS reaction norm. *Res. Popul. Ecol.* **39**: 127–137.  
610
- 611 Farrell E.J., Úbeda F. & Gardner A. (in press) Intra-genomic conflict over dispersal. *Am. Nat.*  
612 doi: 10.1086/682275  
613
- 614 Flanagan, K.E., West, S.A. & Godfray, H.C.J. 1998. Local mate competition, variable  
615 fecundity and information use in a parasitoid. *Anim. Behav.* **56**: 191–198.  
616



- 617 Foster, W.A. & Benton, T.G. 1992. Sex ratio, local mate competition and mating behaviour in  
618 the aphid *Pemphigus spyrothecae*. *Behav. Ecol. Sociobiol.* **30**: 297-307.
- 619
- 620 Frank, S.A. 1985. Hierarchical selection theory and sex ratios. II. On applying the theory, and  
621 a test with fig wasps. *Evolution* **39**: 949–964.
- 622
- 623 Frank, S.A. 1986. Dispersal polymorphisms in subdivided populations. *J. Theor. Biol.* **122**:  
624 303–309.
- 625
- 626 Frank, S.A. 1986. The genetic value of sons and daughters. *Heredity* **56**: 351–354.
- 627
- 628 Frank, S.A. 1987a. Demography and sex ratio in social spiders. *Evolution* **41**: 1267–1281.
- 629
- 630 Frank, S.A. 1987b. Individual and population sex allocation patterns. *Theor. Popul. Biol.* **31**:  
631 47–74.
- 632
- 633 Frank, S.A. 1987c. Variable sex ratio among colonies of ants. *Behav. Ecol. Sociobiol.* **20**:  
634 195–201.
- 635
- 636 Frank, S.A. 1996. Policing and group cohesion when resources vary. *Anim. Behav.* **52**: 1163–  
637 1169.
- 638
- 639 Frank, S.A. 1997. Multivariate Analysis of Correlated Selection and Kin Selection, with an  
640 ESS Maximization Method. *J. Theor. Biol.* **189**: 307–316.
- 641

- 642 Frank, S.A. 1998. *Foundations of social evolution*. Princeton University Press, Princeton, NJ,  
643 USA.
- 644
- 645 Gandon, S. 1999. Kin competition, the cost of inbreeding and the evolution of dispersal. *J.*  
646 *Theor. Biol.* **200**: 345–364.
- 647
- 648 Gandon, S. & Michalakis, Y. 1999 Evolutionary stable dispersal rate in a metapopulation with  
649 extinctions and kin competition. *J. Theor. Biol.* **199**: 275–290.
- 650
- 651 Gardner, A. & West, S.A. 2006. Demography, altruism, and the benefits of budding. *J. Evol.*  
652 *Biol.* **19**: 1707–1716.
- 653
- 654 Gardner, A. 2010. Sex-biased dispersal of adults mediates the evolution of altruism among  
655 juveniles. *J. Theor. Biol.* **262**: 339–345.
- 656
- 657 Grafen, A. & Archetti, M. 2008. Natural selection of altruism in inelastic viscous  
658 homogeneous populations. *J. Theor. Biol.* **252**: 694–710.
- 659
- 660 Godfray, H.C.J. 1995. Evolutionary theory of parent–offspring conflict. *Nature* **376**: 133–  
661 138.
- 662
- 663 Gyllenberg, M., Kisdi, É. & Utz, M. 2011a. Variability within families and the evolution of  
664 body-condition-dependent dispersal. *J. Biol. Dyn.* **5**: 191–211.
- 665
- 666 Gyllenberg, M., Kisdi, É. & Utz, M. 2011b. Body condition dependent dispersal in a  
667 heterogeneous environment. *Theor. Popul. Biol.* **79**: 139–154.

668

669 Hager, R. & Jones C.B. 2009. *Reproductive skew in vertebrates: Proximate and ultimate*  
670 *causes*. Cambridge University Press, Cambridge, UK.

671

672 Hamilton, W.D. 1964. The genetical evolution of social behaviour. I & II. *J. Theor. Biol.* **7**:  
673 1–52.

674

675 Hamilton, W.D. 1967. Extraordinary sex ratios. A sex-ratio theory for sex linkage and  
676 inbreeding has new implications in cytogenetics and entomology. *Science* **156**: 477–488.

677

678 Hamilton, W.D. & May, R.M. 1977. Dispersal in stable habitats. *Nature* **269**: 578–581.

679

680 Hasegawa, E., & Yamaguchi, T. 1995 Population structure, local mate competition, and sex-  
681 allocation pattern in the ant *Messor aciculatus*. *Evolution* **49**: 260-265.

682

683 Hastings, A. 1983. Can spatial variation alone lead to selection for dispersal? *Theor. Popul.*  
684 *Biol.* **24**: 244-251.

685

686 Holt, R.D. 1985. Population dynamics in two-patch environments: Some anomalous  
687 consequences of an optimal habitat distribution. *Theor. Popul. Biol.* **28**: 181–208.

688

689 Innocent, T.M., Abe, J., West, S.A. & Reece, S.E. 2010. Competition between relatives and  
690 the evolution of dispersal in a parasitoid wasp. *J.Evol. Biol.* **23**: 1374–1385.

691

692 Irwin, A.J. & Taylor, P.D. 2001. Evolution of altruism in stepping-stone populations with  
693 overlapping generations. *Theor. Popul. Biol.* **60**: 315–325.

694

695 Johnstone, R.A. 2008. Kin selection, local competition, and reproductive skew. *Evolution* **62**:  
696 2592–2599.

697

698 Johnstone, R.A. & Cant, M.A. 2008. Sex differences in dispersal and the evolution of helping  
699 and harming. *Am. Nat.* **172**: 318–330.

700

701 Kappeler, P.M. & Fichtel, C. 2012. Female reproductive competition in *Eulemur rufifrons*:  
702 eviction and reproductive restraint in a plurally breeding Malagasy primate. *Mol. Ecol.* **21**:  
703 685–698.

704

705 Kilner, R.M., Hinde, C.A. 2008. Information warfare and parent-offspring conflict. *Adv. Stud.*  
706 *Behav.* **28**: 283-336.

707

708 Kisdi, É. 2004. Conditional dispersal under kin competition: extension of the Hamilton–May  
709 model to brood size-dependent dispersal. *Theor. Popul. Biol.* **66**: 369–380.

710

711 Kümmerli, R., Gardner, A., West, S.A. & Griffin, A.S. 2009. Limited dispersal, budding  
712 dispersal, and cooperation: an experimental study. *Evolution* **63**: 939–949.

713

714 Lehmann, L., Perrin, N. & Rousset, F. 2006. Population demography and the evolution of  
715 helping behaviors. *Evolution* **60**: 1137–1151.

716

717 Léna, J.-P., Clobert, J., de Fraipont, M., Lecomte, J. & Guyot, G. 1998. The relative influence  
718 of density and kinship on dispersal in the common lizard. *Behav. Ecol.* **9**: 500-507.

719

- 720 Leturque, H. & Rousset, F. 2002. Dispersal, kin competition, and the ideal free distribution in  
721 a spatially heterogeneous population. *Theor. Popul. Biol.* **62**: 169-180.  
722
- 723 Leturque, H. & Rousset, F. 2003 Joint evolution of sex ratio and dispersal: Conditions for  
724 higher dispersal rates from good habitats. *Evol. Ecol.* **17**: 67-84.  
725
- 726 May, R.M. & Seger, J. 1985. Sex ratios in wasps and aphids. *Nature* **318**: 408–409.  
727
- 728 Massol, F., Duputie, A., David, P. & Jarne, P. 2010. Asymmetric patch size distribution leads  
729 to disruptive selection on dispersal. *Evolution* **65**: 490-500.  
730
- 731 McPeck, M.A. & Holt, R.D. 1992. The evolution of dispersal in spatially and temporally  
732 varying environments. *Am. Nat.* **140**: 1010-1027.  
733
- 734 Motro, U. 1983. Optimal rates of dispersal. III. Parent-offspring conflict. *Theor Popul Biol*  
735 **23**: 159–168.  
736
- 737 Ode, P.J. & Rissing, S.W. 2002. Resource abundance and sex allocation by queen and  
738 workers in the harvester ant, *Messor pergandei*. *Behav. Ecol. and Sociobiol.* **51**: 548–556.  
739
- 740 Perrin, N. & Lehmann, L. 2001. Is sociality driven by the costs of dispersal or the benefits of  
741 philopatry? A role for kin-discrimination mechanisms. *Am. Nat.* **158**: 471–483.  
742
- 743 Petersen, C.W. & Fischer, E.A. 1996. Intraspecific variation in sex allocation in a  
744 simultaneous hermaphrodite: The effect of individual size. *Evolution* **50**: 636–645.  
745

- 746 Poethke, H.J. & Hovestadt, T. 2002. Evolution of density- and patch-size-dependent dispersal  
747 rates. *Proc. R. Soc. B* **269**: 637-645.
- 748
- 749 Rodrigues, A. M. M. & Gardner, A. 2012. Evolution of helping and harming in heterogeneous  
750 populations. *Evolution* **66**: 2065–2079.
- 751
- 752 Rodrigues, A.M.M. & Gardner, A. 2013a. Evolution of helping and harming in heterogeneous  
753 groups. *Evolution* **67**: 2284–2298.
- 754
- 755 Rodrigues, A. M. M. & Gardner, A. 2013b. Evolution of helping and harming in viscous  
756 populations when group size varies. *Am. Nat.* **181**: 609–622.
- 757
- 758 Rodrigues, A.M.M. & Johnstone, R.A. 2014. Evolution of positive and negative density-  
759 dependent dispersal. *Proc. R. Soc. B* **281**: 20141226.
- 760
- 761 Rodrigues, A.M.M. & Gardner, A. 2015. Simultaneous failure of two sex-allocation  
762 invariants: implications for sex-ratio variation within and between populations. *Proc. R. Soc.*  
763 *B* **282**: 20150570.
- 764
- 765 Ronce, O., Clobert, J. & Massot, M. 1998. Natal dispersal and senescence. *P. Natl. Acad. Sci.*  
766 **95**: 600–605.
- 767
- 768 Ronce, O., Gandon, S. & Rousset, F. 2000. Kin selection and natal dispersal in an age-  
769 structured population. *Theor Popul Biol* **58**: 143–159.
- 770

- 771 Rousset, F. 2004. *Genetic structure and selection in subdivided populations*. Princeton  
772 University Press, Princeton, NJ.  
773
- 774 Starrfelt, J., & Kokko, H. 2010. Parent-offspring conflict and the evolution of dispersal  
775 distance. *Am. Nat.* **175**: 38–49.  
776
- 777 Stubblefield, J.W. & Seger, J. 1990. Local mate competition with variable fecundity:  
778 dependence of offspring sex ratios on information utilization and mode of male production.  
779 *Behav. Ecol.* **1**: 68–80.  
780
- 781 Taylor, P.D. 1988a. Inclusive fitness models with two sexes. *Theor. Popul. Biol.* **34**: 145–168.  
782
- 783 Taylor, P.D. 1988b. An inclusive fitness model for dispersal of offspring. *J. Theor. Biol.* **130**:  
784 363–378.  
785
- 786 Taylor, P.D. 1992. Altruism in viscous populations - an inclusive fitness model. *Evol. Ecol.*,  
787 **6**: 352–356.  
788
- 789 Taylor, P.D. & Irwin, A. 2000. Overlapping generations can promote altruistic behavior.  
790 *Evolution* **54**: 1135–1141.  
791
- 792 Taylor, P.D., Wild, G. & Gardner, A. 2007. Direct fitness or inclusive fitness: how shall we  
793 model kin selection? *J. Evol. Biol.* **20**: 301–309.  
794
- 795 Travis, J.M., Murrell, D.J. & Dytham, C. 1999. The evolution of density-dependent dispersal.  
796 *Proc. R. Soc. B* **266**: 1837–1842.

797

798 Tollrian, R., & Dodson, S.I. 1999. Inducible defenses in cladocera: Constraints, costs, and  
799 multipredator environments. In: *The ecology and evolution of inducible defenses*  
800 (R. Tollrian, C. D. Harvell, eds), pp. 177–202. Princeton University Press, Princeton, NJ.

801

802 Vehrencamp, S.L. 1983. A model for the evolution of despotic versus egalitarian societies.  
803 *Anim. Behav.* **31**: 667–682.

804

805 Yamaguchi, Y. 1985. Sex ratios of an aphid subject to local mate competition with variable  
806 maternal condition. *Nature* **385**: 460–462.

807

808 West, S.A., Murray, M.G., Machado, C.A., Griffin, A.S. & Herre, E.A. 2001. Testing  
809 Hamilton's rule with competition between relatives. *Nature* **409**: 510–513.

810

811 Wilson, D.S., Pollock, G.B. & Dugatkin, L. A. 1992. Can altruism evolve in purely viscous  
812 populations. *Evol Ecol* **6**: 331–341.

813

814 Wool, D. & Sulami, Z. 2001. Induction of alate sexuparae in root-cage colonies, and female-  
815 biased sex ratios in the galling aphid, *Aploneura lentisci*. *Entomologia Experimentalis et*  
816 *Applicata* **101**: 299–303.

817

818 Wright, S. 1931. Evolution in Mendelian populations. *Genetics* **16**: 97-159.

819

820 Yeh, A.Y.-C. & Gardner, A. 2012. A general ploidy model for the evolution of helping in  
821 viscous populations. *J. Theor. Biol.* **304**: 297–303.

822



## Figure legends

823

824

825 **Figure 1. Convergence stable dispersal rates in heterogeneous groups.** The CS dispersal  
826 strategies of offspring of high-fecundity rank-1 breeders ( $z_1^*$ , solid lines) and of offspring of  
827 low-fecundity rank-2 breeders ( $z_2^*$ , dashed lines) as a function of the reproductive inequality  
828 ( $s$ ) for varying cost of dispersal ( $c$ ). The dispersal rate of offspring of high-fecundity breeders  
829 is greater than that of offspring of low-fecundity breeders (i.e.  $z_1^* > z_2^*$ ). All breeders produce  
830 the same number of offspring that remain in the natal patch as long as low-fecundity mothers  
831 give birth to a sufficiently high number of offspring.

832

833 **Figure 2. Convergence stable dispersal rates in heterogeneous populations.** The CS  
834 dispersal strategies of offspring of high-fecundity rank-1 breeders ( $z_{1X}^*$ , solid lines) and of  
835 offspring of low-fecundity rank-2 breeders ( $z_{2X}^*$ , dashed lines) in high resource-availability  
836 rank-1 patches ( $z_{X1}^*$ ) and in low resource-availability rank-2 patches ( $z_{X2}^*$ ) as a function of  
837 the reproductive inequality ( $s$ ) for temporally stable, unpredictable, and seasonal  
838 environments. (a,d) In temporally seasonal environments average dispersal is higher from  
839 rank-1 patches, and the CPH holds as long as inequality is sufficiently small. (b,e). In  
840 temporally unpredictable environments average dispersal is higher from rank-1 patches, and  
841 the CPH holds both within and between patches as long as inequality is sufficiently small.  
842 (c,f) In temporally stable environments average dispersal is higher from rank-2 patches, and  
843 the CPH holds as long as inequality is sufficiently small. Parameter values:  $c = 0.50$ ,  $p = 0.50$ .

844

845 **Figure 3. Parent-offspring conflict.** The CS dispersal strategies of mothers (solid lines) and  
846 of daughters under complete maternity information (offspring<sub>C</sub>, dotted lines) and under no  
847 maternity information (offspring<sub>U</sub>, dashed lines) for (a) rank-1 resource-rich families, and (b)  
848 rank-2 resource-poor families. Under lower reproductive inequality, parent-offspring conflict

849 is more intense for low-fecundity families. For resource-rich families, parent-offspring  
850 conflict is more intense under no-maternity information irrespective of the inequality between  
851 families. For resource-poor families, parent-offspring conflict is less intense under no-  
852 maternity information to the left of the vertical dashed line. The number of philopatric  
853 offspring is in arbitrary units. Parameter values:  $c = 0.25$ .

854

855 **Figure 4. Allomaternal control of dispersal.** The CS dispersal strategies of offspring and the  
856 number of philopatric offspring as a function of rank-1 high-fecundity and rank-2 low-  
857 fecundity mothers degree of control. When mothers control the dispersal of their own  
858 offspring (i.e.  $\alpha = 0$ , and  $\beta = 0$ ) the CPH holds. (a,c) When high-fecundity mothers increase  
859 their control over the dispersal of low-fecundity mothers' offspring, the dispersal of low-  
860 fecundity mothers' offspring rises whilst the dispersal of their own offspring falls. (b,d) When  
861 low-fecundity mothers increase their control over the dispersal of high-fecundity mothers'  
862 offspring, the dispersal of high-fecundity mothers' offspring rises whilst the dispersal of their  
863 own offspring falls. (c,d) The CPH breaks down when mothers do not control the dispersal of  
864 their own offspring or when offspring do not control their own dispersal. The number of  
865 philopatric offspring is in arbitrary units. Parameter values:  $c = 0.25$ ,  $s = 0.5$ .

866

867

868

869

870

871

872

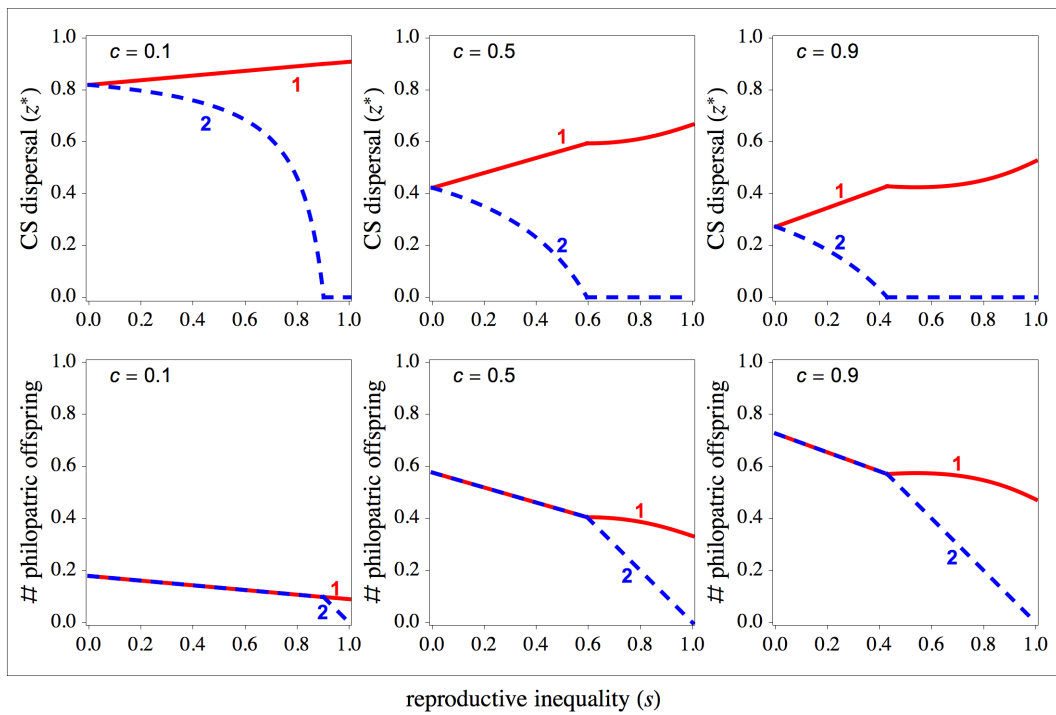

Figure 1

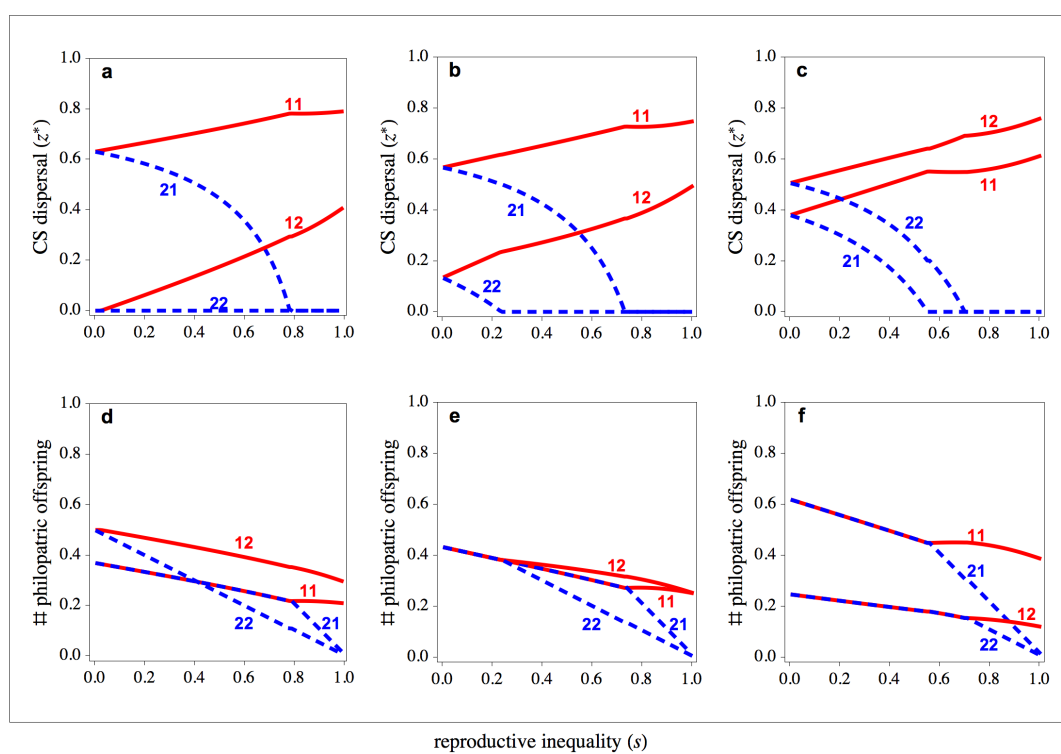

Figure 2

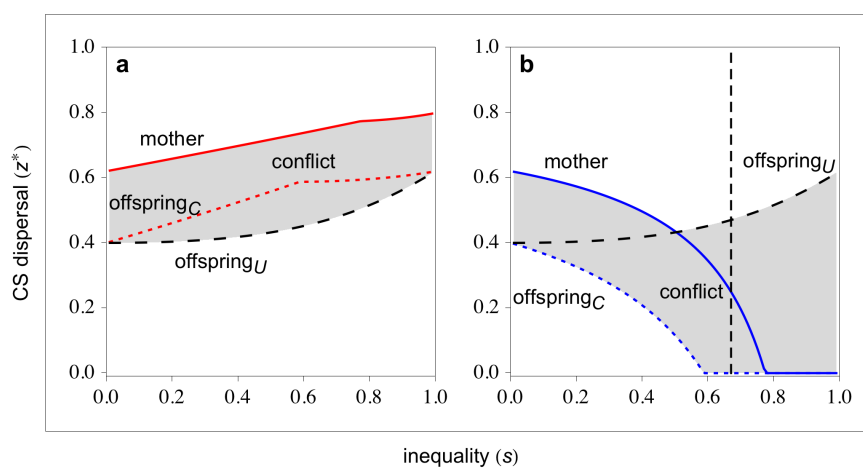

Figure 3

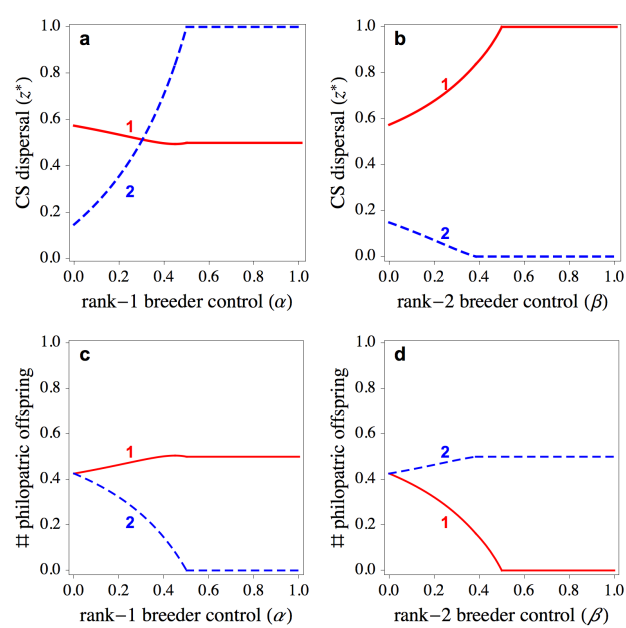

Figure 4
